# Supplementary material for: Impact of Shirodhara on biological markers of stress: A case study
Source: PubMed Central journal article supplement — J Ayurveda Integr Med. 2021 Feb 23;12(1):178–81. doi: 10.1016/j.jaim.2021.01.008 (PMC8039348; doi:10.1016/j.jaim.2021.01.008), 2021-02-23
Supplement: mmc3.pdf [file mmc3.pdf]

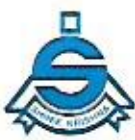

# SHREE KRISHNA ANALYTICAL SERVICES

(An ISO 9001 : 2008, ISO 14001 : 2015 & OHSAS 18001 : 2007)

A-5/4, Mayapuri Industrial Area, Phase-II, New Delhi-110064, Ph. : 011-28115459, 41848475, 9654958120  
E-mail : shreekrishnalab@gmail.com, info@skaslab.com, Web. : www.skaslab.com

GOVT. APPROVED LABORATORY

## REPORT OF ANALYSIS

FORMAT NO : SKAS/DR/002

|                 |                                                                                                                |                 |                      |
|-----------------|----------------------------------------------------------------------------------------------------------------|-----------------|----------------------|
| Submitted By    | : DR. SUJATA RAJAN (ASSOCIATE PROFESSOR)<br>Dept of Physiology, A & U Tibbia<br>College & Hospital, N.Delhi-05 | Report No.      | : SAR-191119001      |
| Sample          | : SESAME OIL (SESAMUM INDICUM)                                                                                 | Received On     | : 19/11/2019         |
| Manufactured By | : NS                                                                                                           | Mfg.Lic.No.     | : ----               |
| Supplied By     | : NS                                                                                                           | Ref No.         | : Nil                |
| Batch No        | : NS                                                                                                           | Ref Date        | : 19/11/2019         |
| NS              | Mfg.Date<br>NS                                                                                                 | Expiry Dt<br>NS | Batch Size<br>NS     |
|                 |                                                                                                                |                 | Sample Qty<br>100 ml |

## RESULTS OF ANALYSIS

Reference : Protocol for testing of ASU Medicines

Description : Yellow coloured viscous liquid

Weight per ml (at 40°C) : 0.8748 g

Refractive Index (at 40°C) : 1.4752

Acid Value : 2.3

Saponification Value : 191.0

Iodine Value : 109.0

Peroxide Value : 1.8

### Test for Heavy metals

Lead as Pb : Less than 10 ppm (NMT 10 ppm)

Arsenic (as As) : Less than 3 ppm (NMT 3 ppm)

Mercury : Less than 1 ppm (NMT 1 ppm)

Cadmium (as Cd) : Less than 0.3 ppm (NMT 0.3 ppm)

### MICROBIAL CONTAMINATION

Total bacterial count : 113 micro-organisms/gm (NMT 100000 micro-organisms/gm)

Total fungal count : Absent/gm (NMT 1000 micro-organisms/gm)

### TEST FOR SPECIFIC PATHOGENS

E.Coli : Absent

Salmonellae : Absent

Pseudomonas : Absent

S.aureus : Absent

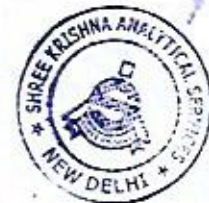

Report : In the opinion of the undersigned the sample referred to above is of standard quality as defined in the Act and the rules made thereunder for the reason given below in above respects

29 Nov 2019

DATE OF COMPLETION

AUTH. SIGN. (MICRO)

AUTH. SIGN. (CHEMICAL/INST.)

PERSON-IN-CHARGE OF TESTING

1. The results listed refer only to tested samples and applicable parameters. Endorsement of product is neither inferred nor implied.
2. Test Certificate in full or parts shall not be used for Promotional or Publicity Purposes & cannot be used as an evidence in the court of law.
3. Sample will be destroyed after one month from the date of issue of test certificate unless otherwise specified.
4. Total Liability of our Analytical Division is Limited to the Invoiced amount.
5. Sample (s) not drawn by us unless other wise stated.

NARENDRA KUMAR GIRI
